# Supplementary material
Source: PubMed Central journal article supplement (PMC6773550)
Supplement: supp_7.3.E598_2018-0028-2-at.pdf [file supp_7.3.E598_2018-0028-2-at.pdf]

## Appendix 2 (as supplied by the authors): Search strategies

### Electronic Database Searches for Review One (Breast Cancer Risk, Prognosis and Mortality in the Trans Population using Cross-sex Hormones: A Systematic Review)

Database: PubMed

Date Run: May 19, 2017

Result Number: 975

Search Strategy:

| Search              | Query                                                                                                                                                                                                                                                                                                                                                                                                                                                                                                                                                                                                                                                                                                                          | Items found            |
|---------------------|--------------------------------------------------------------------------------------------------------------------------------------------------------------------------------------------------------------------------------------------------------------------------------------------------------------------------------------------------------------------------------------------------------------------------------------------------------------------------------------------------------------------------------------------------------------------------------------------------------------------------------------------------------------------------------------------------------------------------------|------------------------|
| <a href="#">#43</a> | Search #12 AND #39 AND #40 Sort by: PublicationDate Filters: Publication date from 1997/01/01 to 2017/12/31; English                                                                                                                                                                                                                                                                                                                                                                                                                                                                                                                                                                                                           | <a href="#">975</a>    |
| <a href="#">#42</a> | Search #12 AND #39 AND #40 Sort by: Author Filters: Publication date from 1997/01/01 to 2017/12/31                                                                                                                                                                                                                                                                                                                                                                                                                                                                                                                                                                                                                             | <a href="#">998</a>    |
| <a href="#">#41</a> | Search #12 AND #39 AND #40 Sort by: Author                                                                                                                                                                                                                                                                                                                                                                                                                                                                                                                                                                                                                                                                                     | <a href="#">1156</a>   |
| <a href="#">#40</a> | Search "Neoplasms/epidemiology"[mh] OR "breast neoplasms"[mh] OR "carcinoma, intraductal, noninfiltrating"[mh] OR ((breast*[tw] OR mammar*[tw] OR "hormone sensitive"[tw] OR "hormone related"[tw]) AND (neoplas*[tw] OR cancer*[tw] OR carcinoma*[tw] OR tumor[tw] OR tumour[tw] OR tumors[tw] OR tumours[tw] OR malignan*[tw])) OR ((hyperplasia[tw] OR carcinoma*[tw]) AND (intraductal[tw] OR DCIS[tw] OR ductal[tw] OR "in situ"[tw] OR noninfiltrating[tw]))                                                                                                                                                                                                                                                             | <a href="#">682561</a> |
| <a href="#">#39</a> | Search "hormone replacement therapy"[mh] OR "gonadotropin-releasing hormone"[mh] OR "Gonadal Steroid Hormones"[mh] OR Testosterone[mh] OR "Ethinyl Estradiol"[mh] OR Estrogens[mh] OR Progesterone[mh] OR Cyproterone[mh] OR ((hormon*[tw] OR estrogen[tw] OR oestrogen[tw] OR testosterone[tw] OR androgen[tw] OR estradiol[tw] OR progesterone[tw] OR Cyproterone[tw] OR GnRH[tw] OR endocrinologic*[tw] OR gonad*[tw] OR HRT[tw]) AND (crosssex[tw] OR "cross sex"[tw] OR sex*[tw] OR CSH[tw] OR antagonist*[tw] OR supplement*[tw] OR agonist*[tw] OR exogenous[tw] OR manag*[tw] OR sequel*[tw] OR replacement[tw] OR therap*[tw] OR feminization[tw] OR feminisation[tw] OR masculinization[tw] OR masculinisation[tw])) | <a href="#">598456</a> |
| <a href="#">#12</a> | Search #7 OR #8 OR #9 OR #10 OR #11                                                                                                                                                                                                                                                                                                                                                                                                                                                                                                                                                                                                                                                                                            | <a href="#">190758</a> |
| <a href="#">#11</a> | Search ("female-to-male"[tw] OR "male-to-female"[tw] OR FTM[tw] OR MTF[tw] OR sexual minorit*[tw] OR cross gender*[tw] OR crossgender*[tw] OR transvesti*[tw] OR cross dress*[tw] OR crossdress*[tw] OR cross sex*[tw] OR crosssex*[tw] OR agender[tw] OR bigender[tw] OR "bi gender"[tw] OR genderqueer[tw] OR cisgender[tw] OR "cis gender"[tw] OR two spirit*[tw] OR twospirit*[tw] OR 2 spirit*[tw] OR 2spirit*[tw])                                                                                                                                                                                                                                                                                                       | <a href="#">24645</a>  |
| <a href="#">#10</a> | Search ((gender*[tw] OR sex*[tw]) AND (trans*[tw] OR variant[tw] OR identity[tw] OR "non binary"[tw] OR nonbinary[tw] OR queer[tw] OR fluid[tw] OR nonconform*[tw] OR non conform*[tw] OR reassign*[tw] OR re assign*[tw] OR dysphori*[tw]))                                                                                                                                                                                                                                                                                                                                                                                                                                                                                   | <a href="#">49905</a>  |
| <a href="#">#9</a>  | Search ((trans*[tw]) AND (sex*[tw] OR gender*[tw] OR woman[tw] OR women[tw] OR female*[tw] OR feminine[tw] OR male[tw] OR males[tw] OR man[tw] OR men[tw] OR masc*[tw] OR identified[tw] OR person[tw] OR persons[tw] OR people[tw] OR peoples[tw]))                                                                                                                                                                                                                                                                                                                                                                                                                                                                           | <a href="#">119842</a> |
| <a href="#">#8</a>  | Search transgend*[tw] OR transsex*[tw] OR transman[tw] OR transmen[tw] OR transwom*[tw] OR transfem*[tw] OR transmasc*[tw] OR transmale*[tw] OR transidentified[tw] OR transperson[tw] OR transpeople[tw] OR transpeoples[tw] OR transpersons[tw]                                                                                                                                                                                                                                                                                                                                                                                                                                                                              | <a href="#">10028</a>  |
| <a href="#">#7</a>  | Search "transgender persons"[mh] OR "health services for transgender persons"[mh] OR transsexualism[mh] OR transvestism[mh]                                                                                                                                                                                                                                                                                                                                                                                                                                                                                                                                                                                                    | <a href="#">4591</a>   |

Database: MEDLINE

Date Run: May 19, 2017

Platform/Interface: Ovid MEDLINE(R) 1946 to May Week 20 2017

Result Number: 290

Search Strategy:

| #  | Searches                                                                                                                                                                                                                                                                                                                                                                                  | Results |
|----|-------------------------------------------------------------------------------------------------------------------------------------------------------------------------------------------------------------------------------------------------------------------------------------------------------------------------------------------------------------------------------------------|---------|
| 1  | exp "transgender persons"/ or exp "health services for transgender persons"/ or exp transsexualism/ or exp transvestism/                                                                                                                                                                                                                                                                  | 4783    |
| 2  | (transgend* or transsex* or transman or transmen or transwom* or transfem* or transmasc* or transmale* or transgender* or transperson or transpersons or transpeople or transpeoples).ti,ab,kw.                                                                                                                                                                                           | 7598    |
| 3  | (trans* adj2 (sex* or gender* or woman or women* or female* or feminine or male or males or man or men or masc* or identified or person or persons or people or peoples)).ti,ab,kw.                                                                                                                                                                                                       | 61104   |
| 4  | ((gender* or sex*) adj2 (trans* or variant or identity or "non binary" or nonbinary or queer or fluid or nonconform* or "non conform*" or reassign* or "re assign*" or dysphori*)).ti,ab,kw.                                                                                                                                                                                              | 36407   |
| 5  | ("female-to-male" or "male-to-female" or FTM or MTF or "sexual minorit*" or "cross gender*" or crossgender* or transvesti* or "cross dress*" or crossdress* or "cross sex*" or crosssex* or agender or bigender or "bi gender" or genderqueer or cisgender or "cis gender" or "two spirit*" or twospirit* or "2 spirit*" or 2spirit*).ti,ab,kw.                                           | 103394  |
| 6  | or/1-5                                                                                                                                                                                                                                                                                                                                                                                    | 168941  |
| 7  | exp "hormone replacement therapy"/ or exp "gonadotropin-releasing hormone"/ or exp "Gonadal Steroid Hormones"/ or exp Testosterone/ or exp "Ethinyl Estradiol"/ or exp Estrogens/ or exp Progesterone/ or exp Cyproterone/                                                                                                                                                                | 302060  |
| 8  | ((hormon* or estrogen or oestrogen or testosterone or androgen or estradiol or cyproterone or progesterone or GnRH or endocrinologic* or gonad* or HRT) and ("crosssex" or crosssex or sex or CSH or antagonist* or supplement* or agonist* or exogenous or manag* or sequel* or replacement or therap* or feminization or feminisation or masculinization or masculinisation)).ti,ab,kw. | 230680  |
| 9  | or/7-8                                                                                                                                                                                                                                                                                                                                                                                    | 443977  |
| 10 | exp neoplasms/ep or exp "breast neoplasms"/ or exp "carcinoma, intraductal, noninfiltrating"/                                                                                                                                                                                                                                                                                             | 391505  |
| 11 | ((breast* or mammar* or "hormone sensitive" or "hormone related") adj2 (neoplas* or cancer* or carcinoma* or tumor or tumour or tumors or tumours or malignan*)).ti,ab,kw.                                                                                                                                                                                                                | 246915  |
| 12 | ((hyperplasia or carcinoma*) adj2 (intraductal or DCIS or ductal or "in situ" or noninfiltrating)).ti,ab,kw.                                                                                                                                                                                                                                                                              | 23806   |
| 13 | or/10-12                                                                                                                                                                                                                                                                                                                                                                                  | 453196  |
| 14 | 6 and 9 and 13                                                                                                                                                                                                                                                                                                                                                                            | 401     |
| 15 | limit 14 to (english language and yr="1997 -Current")                                                                                                                                                                                                                                                                                                                                     | 290     |

Database: Embase

Date Run: May 19, 2017

Platform/Interface: Ovid Embase 1974 to 2017 Week 20

Result Number: 326

Search Strategy:

| #  | Searches                                                                                                                                                                                                                                                                                                                                                                                  | Results |
|----|-------------------------------------------------------------------------------------------------------------------------------------------------------------------------------------------------------------------------------------------------------------------------------------------------------------------------------------------------------------------------------------------|---------|
| 1  | exp transgender/ or *"health service"/ or exp transsexualism/ or exp "cross dressing"/                                                                                                                                                                                                                                                                                                    | 56978   |
| 2  | (transgend* or transsex* or transman or transmen or transwom* or transfem* or transmasc* or transmale* or transgender* or transperson or transpersons or transpeople or transpeoples).ti,ab,kw.                                                                                                                                                                                           | 12829   |
| 3  | (trans* adj2 (sex* or gender* or woman or women or female* or feminine or male or males or man or men or masc* or identified or person or persons or people or peoples)).ti,ab,kw.                                                                                                                                                                                                        | 81302   |
| 4  | ((gender* or sex*) adj1 (trans* or variant or identity or "non binary" or nonbinary or queer or fluid or nonconform* or "non conform*" or reassign* or "re assign*" or dysphori*)).ti,ab,kw.                                                                                                                                                                                              | 44447   |
| 5  | ("female-to-male" or "male-to-female" or FTM or MTF or "sexual minorit*" or "cross gender*" or crossgender* or transvesti* or "cross dress*" or crossdress* or "cross sex*" or crosssex* or agender or bigender or "bi gender" or genderqueer or cisgender or "cis gender" or "two spirit*" or twospirit* or "2 spirit*" or 2spirit*).ti,ab,kw.                                           | 162439  |
| 6  | or/1-5                                                                                                                                                                                                                                                                                                                                                                                    | 302119  |
| 7  | *"hormone substitution"/ or *gonadorelin/ or "sex hormone"/ or *Testosterone/ or *"ethinylestradiol"/ or *Estrogens/ or *Progesterone/ or *Cyproterone/                                                                                                                                                                                                                                   | 165986  |
| 8  | ((hormon* or estrogen or oestrogen or testosterone or androgen or estradiol or cyproterone or progesterone or GnRH or endocrinologic* or gonad* or HRT) and ("crosssex" or crosssex or sex or CSH or antagonist* or supplement* or agonist* or exogenous or manag* or sequel* or replacement or therap* or feminization or feminisation or masculinization or masculinisation)).ti,ab,kw. | 329932  |
| 9  | or/7-8                                                                                                                                                                                                                                                                                                                                                                                    | 436198  |
| 10 | neoplasm/ep or *"breast tumor"/ or *"intraductal carcinoma"/                                                                                                                                                                                                                                                                                                                              | 66437   |
| 11 | ((breast* or mammar* or "hormone sensitive" or "hormone related") adj2 (neoplas* or cancer* or carcinoma* or tumor or tumour or tumors or tumours or malignan*)).ti,ab,kw.                                                                                                                                                                                                                | 373351  |
| 12 | ((hyperplasia or carcinoma*) adj2 (intraductal or DCIS or ductal or "in situ" or noninfiltrating)).ti,ab,kw.                                                                                                                                                                                                                                                                              | 35492   |
| 13 | or/10-12                                                                                                                                                                                                                                                                                                                                                                                  | 413959  |
| 14 | 6 and 9 and 13                                                                                                                                                                                                                                                                                                                                                                            | 396     |
| 15 | limit 14 to (english language and yr="1997 -Current")                                                                                                                                                                                                                                                                                                                                     | 326     |

Database: CINAHL

Date Run: May 19, 2017

Platforms/Interface: EBSCOhost Research Databases

Result Number: 33

Search Strategy:

| Search ID# | Search Terms                                                                                                                                                                                       | Search Options                                                                                                      | Actions                                                                                                                      |
|------------|----------------------------------------------------------------------------------------------------------------------------------------------------------------------------------------------------|---------------------------------------------------------------------------------------------------------------------|------------------------------------------------------------------------------------------------------------------------------|
| S29        | S14 AND S19 AND S27                                                                                                                                                                                | Limiters -<br>Published<br>Date:<br>19970101-<br>20171231;<br>English<br>Language;<br>Exclude<br>MEDLINE<br>records | <a href="#">View Results</a>  (33)        |
| S28        | S14 AND S19 AND S27                                                                                                                                                                                |                                                                                                                     | <a href="#">View Results</a>  (117)       |
| S27        | S20 OR S21 OR S22 OR S23 OR S24 OR S25 OR S26                                                                                                                                                      |                                                                                                                     | <a href="#">View Results</a>  (228,018)   |
| S26        | ((TX hyperplasia or TX carcinoma*) w2 (TX intraductal or TX DCIS or TX ductal or TX "in situ" or TX noninfiltrating))                                                                              |                                                                                                                     | <a href="#">View Results</a>  (2,299)   |
| S25        | ((AB hyperplasia or AB carcinoma*) w2 (AB intraductal or AB DCIS or AB ductal or AB "in situ" or AB noninfiltrating))                                                                              |                                                                                                                     | <a href="#">View Results</a>  (759)     |
| S24        | ((TI hyperplasia or TI carcinoma*) w2 (TI intraductal or TI DCIS or TI ductal or TI "in situ" or TI noninfiltrating))                                                                              |                                                                                                                     | <a href="#">View Results</a>  (442)     |
| S23        | ((TX breast* or TX mammar* OR TX "hormone sensitive" OR TX "hormone related") w2 (TX neoplas* or TX cancer* or TX carcinoma* or TX tumor or TX tumour or TX tumors or TX tumours or TX malignan*)) |                                                                                                                     | <a href="#">View Results</a>  (50,460)  |
| S22        | ((AB breast* or AB mammar* or AB "hormone sensitive" OR AB "hormone related") w2 (AB neoplas* or AB cancer* or AB carcinoma* or AB tumor or AB tumour or AB tumors or AB tumours or AB malignan*)) |                                                                                                                     | <a href="#">View Results</a>  (22,127)  |
| S21        | ((TI breast* or TI mammar* or TI "hormone sensitive" OR TI "hormone related") w2 (TI neoplas* or TI cancer* or TI carcinoma* or TI tumor or TI tumour or TI tumors or TI tumours or TI malignan*)) |                                                                                                                     | <a href="#">View Results</a>  (27,051)  |
| S20        | MH "Neoplasms+/EP or MH "breast neoplasms+" or MH "carcinoma, ductal, breast+"                                                                                                                     |                                                                                                                     | <a href="#">View Results</a>  (221,233) |
| S19        | S15 OR S16 OR S17 OR S18                                                                                                                                                                           |                                                                                                                     | <a href="#">View Results</a>  (43,367)  |

| Search ID# | Search Terms                                                                                                                                                                                                                                                                                                                                                                                                                                                                                        | Search Options | Actions                                                                                                                     |
|------------|-----------------------------------------------------------------------------------------------------------------------------------------------------------------------------------------------------------------------------------------------------------------------------------------------------------------------------------------------------------------------------------------------------------------------------------------------------------------------------------------------------|----------------|-----------------------------------------------------------------------------------------------------------------------------|
| S18        | ((TX hormon* or TX estrogen or TX oestrogen or TX testosterone or TX progesterone OR TX androgen OR TX estradiol or TX cyproterone or TX "Gonadal Steroid Hormones" TX GnRH or TX endocrinologic* or TX gonad* or TX HRT) and (TX "crosssex" or TX crosssex or TX sex or TX "CSH" or TX antagonist* or TX supplement* or TX agonist* or TX exogenous or TX manag* or TX sequel* or TX replacement or TX therap* or TX feminization or TX feminisation or TX masculinization or TX masculinisation)) |                | <a href="#">View Results</a>  (39,401)   |
| S17        | ((AB hormon* or AB estrogen or AB oestrogen or AB testosterone or AB progesterone OR AB androgen OR AB estradiol or AB cyproterone or AB "Gonadal Steroid Hormones" AB GnRH or AB endocrinologic* or AB gonad* or AB HRT) and (AB "crosssex" or AB crosssex or AB sex or AB "CSH" or AB antagonist* or AB supplement* or AB agonist* or AB exogenous or AB manag* or AB sequel* or AB replacement or AB therap* or AB feminization or AB feminisation or AB masculinization or AB masculinisation)) |                | <a href="#">View Results</a>  (12,935)   |
| S16        | ((TI hormon* or TI estrogen or TI oestrogen or TI testosterone or TI progesterone OR TI androgen OR TI estradiol or TI cyproterone or TI "Gonadal Steroid Hormones" TI GnRH or TI endocrinologic* or TI gonad* or TI HRT) and (TI "crosssex" or TI crosssex or TI sex or TI "CSH" or TI antagonist* or TI supplement* or TI agonist* or TI exogenous or TI manag* or TI sequel* or TI replacement or TI therap* or TI feminization or TI feminisation or TI masculinization or TI masculinisation)) |                | <a href="#">View Results</a>  (4,628)    |
| S15        | MH "Hormone Replacement Therapy+" or MH "Gonadorelin+" or MH "Sex Hormones+" or MH "Testosterone+" or MH "Estradiol" or MH "Estrogens+" or MH "Progesterone+"                                                                                                                                                                                                                                                                                                                                       |                | <a href="#">View Results</a>  (18,180) |
| S14        | S1 OR S2 OR S3 OR S4 OR S5 OR S6 OR S7 OR S8 OR S9 OR S10 OR S11 OR S12 OR S13                                                                                                                                                                                                                                                                                                                                                                                                                      |                | <a href="#">View Results</a>  (46,421) |
| S13        | (TX "female-to-male" or TX "male-to-female" or TX FTM or TX MTF or TX "sexual minorit*" or TX "cross gender*" or TX crossgender* or TX transvesti* or TX "cross dress*" or TX crossdress* or TX "cross sex*" or TX crosssex* or TX agender or TX bigender or TX "bi gender" or TX genderqueer or TX cisgender or TX "cis gender" or TX "two spirit*" or TX twospirit* or TX "2 spirit*" or TX 2spirit*)                                                                                             |                | <a href="#">View Results</a>  (10,657) |
| S12        | (AB "female-to-male" or AB "male-to-female" or AB FTM or AB MTF or AB "sexual minorit*" or AB "cross gender*" or AB crossgender* or AB transvesti* or AB "cross dress*" or AB crossdress* or AB "cross sex*" or AB crosssex* or AB agender or AB bigender or AB "bi gender" or AB                                                                                                                                                                                                                   |                | <a href="#">View Results</a>  (9,184)  |

| Search ID# | Search Terms                                                                                                                                                                                                                                                                                                                                                                                            | Search Options | Actions                                                                                                                    |
|------------|---------------------------------------------------------------------------------------------------------------------------------------------------------------------------------------------------------------------------------------------------------------------------------------------------------------------------------------------------------------------------------------------------------|----------------|----------------------------------------------------------------------------------------------------------------------------|
|            | genderqueer or AB cisgender or AB "cis gender" or AB "two spirit*" or AB twospirit* or AB "2 spirit*" or AB 2spirit*)                                                                                                                                                                                                                                                                                   |                |                                                                                                                            |
| S11        | (TI "female-to-male" or TI "male-to-female" or TI FTM or TI MTF or TI "sexual minorit*" or TI "cross gender*" or TI crossgender* or TI transvesti* or TI "cross dress*" or TI crossdress* or TI "cross sex*" or TI crosssex* or TI agender or TI bigender or TI "bi gender" or TI genderqueer or TI cisgender or TI "cis gender" or TI "two spirit*" or TI twospirit* or TI "2 spirit*" or TI 2spirit*) |                | <a href="#">View Results</a>  (1,416)   |
| S10        | ((TX gender* or TX sex*) w1 (TX trans* or TX variant or TX identity or TX "non binary" or TX nonbinary or TX queer or TX fluid or TX nonconform* or TX "non conform*" or TX reassign* or TX "re assign*" or TX dysphori*))                                                                                                                                                                              |                | <a href="#">View Results</a>  (17,506)  |
| S9         | ((AB gender* or AB sex*) w1 (AB trans* or AB variant or AB identity or AB "non binary" or AB nonbinary or AB queer or AB fluid or AB nonconform* or AB "non conform*" or AB reassign* or AB "re assign*" or AB dysphori*))                                                                                                                                                                              |                | <a href="#">View Results</a>  (6,598)   |
| S8         | ((TI gender* or TI sex*) w1 (TI trans* or TI variant or TI identity or TI "non binary" or TI nonbinary or TI queer or TI fluid or TI nonconform* or TI "non conform*" or TI reassign* or TI "re assign*" or TI dysphori*))                                                                                                                                                                              |                | <a href="#">View Results</a>  (2,877)   |
| S7         | ((TX trans*) w2 (TX sex* or TX gender* or TX woman or TX women or TX female* or TX feminine or TX male or TX males or TX man or TX men or TX masc* or TX identified or TX person or TX persons or TX people or TX peoples))                                                                                                                                                                             |                | <a href="#">View Results</a>  (5,051) |
| S6         | ((AB trans*) w2 (AB sex* or AB gender* or AB woman or AB women or AB female* or AB feminine or AB male or AB males or AB man or AB men or AB masc* or AB identified or AB person or AB persons or AB people or AB peoples))                                                                                                                                                                             |                | <a href="#">View Results</a>  (3,156) |
| S5         | ((TI trans*) w2 (TI sex* or TI gender* or TI woman or TI women or TI female* or TI feminine or TI male or TI males or TI man or TI men or TI masc* or TI identified or TI person or TI persons or TI people or TI peoples))                                                                                                                                                                             |                | <a href="#">View Results</a>  (954)   |
| S4         | (TX transgend* or TX transsex* or TX transman or TX transmen or TX transwom* or TX transfem* or TX transmasc* or TX transmale* or TX transidentified or TX transperson or TX transpersons or TX transpeople or TX transpeoples)                                                                                                                                                                         |                | <a href="#">View Results</a>  (3,180) |
| S3         | (AB transgend* or AB transsex* or AB transman or AB transmen or AB transwom* or AB transfem* or AB transmasc* or AB transmale* or AB transidentified or AB transperson or AB transpersons or AB transpeople or AB transpeoples)                                                                                                                                                                         |                | <a href="#">View Results</a>  (1,861) |

| <u>Search ID#</u> | Search Terms                                                                                                                                                                                                                    | Search Options | Actions                                                                                                                   |
|-------------------|---------------------------------------------------------------------------------------------------------------------------------------------------------------------------------------------------------------------------------|----------------|---------------------------------------------------------------------------------------------------------------------------|
| S2                | MH "transgender persons+" or MH "health services needs and demand+" or MH "transsexualism" or MH "transvestism"                                                                                                                 |                | <a href="#">View Results</a>  (15,854) |
| S1                | (TI transgend* or TI transsex* or TI transman or TI transmen or TI transwom* or TI transfem* or TI transmasc* or TI transmale* or TI transidentified or TI transperson or TI transpersons or TI transpeople or TI transpeoples) |                | <a href="#">View Results</a>  (1,460)  |

**Database:** Cochrane Database of Systematic Reviews

**Date Run:** May 19, 2017

**Platform/Interface:** Ovid Evidence-Based Medicine Reviews, Cochrane Database of Systematic Reviews 2005 to May 19, 2017

**Result Number:** 123

**Search Strategy:**

| # | Searches                                                                                                                                                                                                                                                                                                                                        | Results |
|---|-------------------------------------------------------------------------------------------------------------------------------------------------------------------------------------------------------------------------------------------------------------------------------------------------------------------------------------------------|---------|
| 1 | (transgend* or transsex* or transman or transmen or transwom* or transfem* or transmasc* or transmale* or transgender* or transperson or transpersons or transpeople or transpeoples).ti,ab,kw.                                                                                                                                                 | 7       |
| 2 | (trans* adj2 (sex* or gender* or woman or women or female* or feminine or male or males or man or men or masc* or identified or person or persons or people or peoples)).ti,ab,kw.                                                                                                                                                              | 99      |
| 3 | ((gender* or sex*) adj1 (trans* or variant or identity or "non binary" or nonbinary or queer or fluid or nonconform* or non conform* or reassign* or re assign* or dysphori*)).ti,ab,kw.                                                                                                                                                        | 43      |
| 4 | ("female-to-male" or "male-to-female" or FTM or MTF or "sexual minorit*" or "cross gender*" or crossgender* or transvesti* or "cross dress*" or crossdress* or "cross sex*" or crosssex* or agender or bigender or "bi gender" or genderqueer or cisgender or "cis gender" or "two spirit*" or twospirit* or "2 spirit*" or 2spirit*).ti,ab,kw. | 25      |
| 5 | or/1-4                                                                                                                                                                                                                                                                                                                                          | 123     |



# Electronic Database Searches for Review Two (Benefits and Harms of Breast Screening for the Trans Population: A Systematic Review)

Database: PubMed

Date Run: May 9, 2017

Result Number: 283

Search Strategy:

| Search              | Query                                                                                                                                                                                                                                                                                                                                                                                                                    | Items found             |
|---------------------|--------------------------------------------------------------------------------------------------------------------------------------------------------------------------------------------------------------------------------------------------------------------------------------------------------------------------------------------------------------------------------------------------------------------------|-------------------------|
| <a href="#">#24</a> | Search #13 AND #16 AND #20 Sort by: PublicationDate Filters: Publication date from 1997/01/01 to 2017/12/31; Humans; English                                                                                                                                                                                                                                                                                             | <a href="#">283</a>     |
| <a href="#">#23</a> | Search #13 AND #16 AND #20 Sort by: PublicationDate Filters: Publication date from 1997/01/01 to 2017/12/31; English                                                                                                                                                                                                                                                                                                     | <a href="#">337</a>     |
| <a href="#">#22</a> | Search #13 AND #16 AND #20 Sort by: PublicationDate Filters: English                                                                                                                                                                                                                                                                                                                                                     | <a href="#">365</a>     |
| <a href="#">#21</a> | Search #13 AND #16 AND #20                                                                                                                                                                                                                                                                                                                                                                                               | <a href="#">394</a>     |
| <a href="#">#20</a> | Search #17 OR #18 OR #19                                                                                                                                                                                                                                                                                                                                                                                                 | <a href="#">404948</a>  |
| <a href="#">#19</a> | Search ((hyperplasia[tw] or carcinoma*[tw]) AND (intraductal[tw] OR DCIS[tw] OR ductal[tw] OR "in situ"[tw] OR noninfiltrating[tw]))                                                                                                                                                                                                                                                                                     | <a href="#">70059</a>   |
| <a href="#">#18</a> | Search ((breast*[tw] OR mammar*[tw]) AND (neoplasm*[tw] OR cancer*[tw] OR carcinoma*[tw] OR tumor[tw] OR tumour[tw] OR tumors[tw] OR tumours[tw] OR malignan*[tw]))                                                                                                                                                                                                                                                      | <a href="#">366266</a>  |
| <a href="#">#17</a> | Search ("breast neoplasms"[mh] OR "carcinoma, intraductal, noninfiltrating"[mh])                                                                                                                                                                                                                                                                                                                                         | <a href="#">250380</a>  |
| <a href="#">#16</a> | Search #14 OR #15                                                                                                                                                                                                                                                                                                                                                                                                        | <a href="#">1964031</a> |
| <a href="#">#15</a> | Search "clinical breast exam"[tw] OR "breast self-exam"[tw] OR "CBE"[tw] OR "BSE"[tw] OR mammogra*[tw] OR xeromammogra*[tw] OR tomosynthesis[tw] OR scintimammogra*[tw] OR MRI[tw] OR "magnetic resonance imaging"[tw] OR ultrasound*[tw] OR ultrasonograph*[tw] OR imaging[tw]                                                                                                                                          | <a href="#">1857922</a> |
| <a href="#">#14</a> | Search "mass screening"[mh] OR "early detection of cancer"[mh] OR "mammography"[mh] OR "magnetic resonance imaging"[majr] OR "ultrasonography, mammary"[mh]                                                                                                                                                                                                                                                              | <a href="#">289175</a>  |
| <a href="#">#13</a> | Search #8 OR #9 OR #10 OR #11 OR #12                                                                                                                                                                                                                                                                                                                                                                                     | <a href="#">190380</a>  |
| <a href="#">#12</a> | Search ("female-to-male"[tw] OR "male-to-female"[tw] OR FTM[tw] OR MTF[tw] OR sexual minorit*[tw] OR cross gender*[tw] OR crossgender*[tw] OR transvesti*[tw] OR cross dress*[tw] OR crossdress*[tw] OR cross sex*[tw] OR crosssex*[tw] OR agender[tw] OR bigender[tw] OR "bi gender"[tw] OR genderqueer[tw] OR cisgender[tw] OR "cis gender"[tw] OR two spirit*[tw] OR twospirit*[tw] OR 2 spirit*[tw] OR 2spirit*[tw]) | <a href="#">24543</a>   |
| <a href="#">#11</a> | Search ((gender*[tw] OR sex*[tw]) AND (trans*[tw] OR variant[tw] OR identity[tw] OR "non binary"[tw] OR nonbinary[tw] OR queer[tw] OR fluid[tw] OR nonconform*[tw] OR non conform*[tw] OR reassign*[tw] OR re assign*[tw] OR dysphori*[tw]))                                                                                                                                                                             | <a href="#">49811</a>   |
| <a href="#">#10</a> | Search ((trans*[tw]) AND (sex*[tw] OR gender*[tw] OR woman[tw] OR women[tw] OR female*[tw] OR feminine[tw] OR male[tw] OR males[tw] OR man[tw] OR men[tw] OR masc*[tw] OR identified[tw] OR person[tw] OR persons[tw] OR people[tw] OR peoples[tw]))                                                                                                                                                                     | <a href="#">119654</a>  |
| <a href="#">#9</a>  | Search (transgend*[tw] OR transsex*[tw] OR transman[tw] OR transmen[tw] OR transwom*[tw] OR transfem*[tw] OR transmasc*[tw] OR transmale*[tw] OR transidentified[tw] OR transperson[tw] OR transpersons[tw] OR transpeople[tw] OR transpeoples[tw])                                                                                                                                                                      | <a href="#">9981</a>    |
| <a href="#">#8</a>  | Search ("transgender persons"[mh] OR "health services for transgender persons"[mh] OR transsexualism[mh] OR transvestism[mh])                                                                                                                                                                                                                                                                                            | <a href="#">4578</a>    |

Database: MEDLINE

Date Run: May 9, 2017

Platform/Interface: Ovid MEDLINE(R) 1946 to May Week 19 2017

Result Number: 135

Search Strategy:

| #  | Searches                                                                                                                                                                                                                                                                                                                                         | Results |
|----|--------------------------------------------------------------------------------------------------------------------------------------------------------------------------------------------------------------------------------------------------------------------------------------------------------------------------------------------------|---------|
| 1  | exp "transgender persons"/ or exp "health services for transgender persons"/ or exp transsexualism/ or exp transvestism/                                                                                                                                                                                                                         | 4766    |
| 2  | (transgend* or transsex* or transman or transmen or transwom* or transfem* or transmasc* or transmale* or transgender* or transperson or transpersons or transpeople or transpeoples).ti,ab,kw.                                                                                                                                                  | 7546    |
| 3  | (trans* adj2 (sex* or gender* or woman or women or female* or feminine or male or males or man or men or masc* or identified or person or persons or people or peoples)).ti,ab,kw.                                                                                                                                                               | 60965   |
| 4  | ((gender* or sex*) adj1 (trans* or variant or identity or "non binary" or nonbinary or queer or fluid or nonconform* or "non conform*" or reassign* or "re assign*" or dysphori*)).ti,ab,kw.                                                                                                                                                     | 33489   |
| 5  | ("female-to-male" or "male-to-female" or FTM or MTF or "sexual minorit*" or "cross gender* " or crossgender* or transvesti* or "cross dress*" or crossdress* or "cross sex*" or crosssex* or agender or bigender or "bi gender" or genderqueer or cisgender or "cis gender" or "two spirit*" or twospirit* or "2 spirit*" or 2spirit*).ti,ab,kw. | 103211  |
| 6  | or/1-5                                                                                                                                                                                                                                                                                                                                           | 168202  |
| 7  | exp "mass screening"/ or exp "early detection of cancer"/ or "magnetic resonance imaging"/ or exp "ultrasonography, mammary"/ or exp "mammography"/                                                                                                                                                                                              | 488102  |
| 8  | (ultrasonograph* or ultrasound* or "clinical breast exam" or "breast self-exam" or "CBE" or "BSE" or mammogra* or "magnetic resonance imaging" or "MRI" or xeromammogra* or scintimammogra* or tomosynthesis or imaging).ti,ab,kw.                                                                                                               | 815503  |
| 9  | or/7-8                                                                                                                                                                                                                                                                                                                                           | 1053160 |
| 10 | exp "breast neoplasms "/ or exp "carcinoma, intraductal, noninfiltrating"/                                                                                                                                                                                                                                                                       | 260029  |
| 11 | ((breast* or mammar*) adj2 (neoplasm* or cancer* or carcinoma* or tumor or tumour or tumors or tumours or malignan*)).ti,ab,kw.                                                                                                                                                                                                                  | 245683  |
| 12 | ((hyperplasia or carcinoma*) adj2 (intraductal or DCIS or ductal or "in situ" or noninfiltrating)).ti,ab,kw.                                                                                                                                                                                                                                     | 23779   |
| 13 | or/10-12                                                                                                                                                                                                                                                                                                                                         | 324329  |
| 14 | 6 and 9 and 13                                                                                                                                                                                                                                                                                                                                   | 177     |
| 15 | limit 14 to (english language and humans and yr="1997 -Current")                                                                                                                                                                                                                                                                                 | 135     |

Database: Embase

Date Run: May 9, 2017

Platform/Interface: Ovid Embase 1974 to 2017 Week 19

Result Number: 222

Search Strategy:

| #  | Searches                                                                                                                                                                                                                                                                                                                                         | Results |
|----|--------------------------------------------------------------------------------------------------------------------------------------------------------------------------------------------------------------------------------------------------------------------------------------------------------------------------------------------------|---------|
| 1  | exp transgender/ or **health service"/ or exp transsexualism/ or exp "cross dressing"/                                                                                                                                                                                                                                                           | 56716   |
| 2  | (transgend* or transsex* or transman or transmen or transwom* or transfem* or transmasc* or transmale* or transgendered or transperson or transpersons or transpeople or transpeoples).ti,ab,kw.                                                                                                                                                 | 12637   |
| 3  | (trans* adj2 (sex* or gender* or woman or women or female* or feminine or male or males or man or men or masc* or identified or person or persons or people or peoples)).ti,ab,kw.                                                                                                                                                               | 80445   |
| 4  | ((gender* or sex*) adj1 (trans* or variant or identity or "non binary" or nonbinary or queer or fluid or nonconform* or "non conform**" or reassign* or "re assign*" or dysphori*)).ti,ab,kw.                                                                                                                                                    | 44035   |
| 5  | ("female-to-male" or "male-to-female" or FTM or MTF or "sexual minorit*" or "cross gender* " or crossgender* or transvesti* or "cross dress*" or crossdress* or "cross sex*" or crosssex* or agender or bigender or "bi gender" or genderqueer or cisgender or "cis gender" or "two spirit*" or twospirit* or "2 spirit*" or 2spirit*).ti,ab,kw. | 161066  |
| 6  | or/1-5                                                                                                                                                                                                                                                                                                                                           | 299648  |
| 7  | **"mass screening"/ or **"early detection of cancer"/ or **"nuclear magnetic resonance imaging"/ or *echomammography/ or *mammography/ or **"digital mammography"/                                                                                                                                                                               | 185020  |
| 8  | (ultrasonograph* or ultrasound* or "clinical breast exam" or "breast self-exam" or "CBE" or "BSE" or mammogra* or "magnetic resonance imaging" or "MRI" or xeromammogra* or scintimammogra* or tomosynthesis or imaging).ti,ab,kw.                                                                                                               | 1323686 |
| 9  | or/7-8                                                                                                                                                                                                                                                                                                                                           | 1361245 |
| 10 | **"breast tumor "/ or "intraductal carcinoma"/                                                                                                                                                                                                                                                                                                   | 66426   |
| 11 | ((breast* or mammar*) adj2 (neoplasm* or cancer* or carcinoma* or tumor or tumour or tumors or tumours or malignan*)).ti,ab,kw.                                                                                                                                                                                                                  | 369160  |
| 12 | ((hyperplasia or carcinoma*) adj2 (intraductal or DCIS or ductal or "in situ" or noninfiltrating)).ti,ab,kw.                                                                                                                                                                                                                                     | 35307   |
| 13 | or/10-12                                                                                                                                                                                                                                                                                                                                         | 403849  |
| 14 | 6 and 9 and 13                                                                                                                                                                                                                                                                                                                                   | 287     |
| 15 | limit 14 to (human and english language and yr="1997 -Current")                                                                                                                                                                                                                                                                                  | 222     |

Database: CINAHL

Date Run: May 9, 2017

Platform/Interface: EBSCOhost Research Databases

Result Number: 36

Search Strategy:

| Search ID# | Search Terms                                                                                                                                               | Search Options                                                                                             | Actions                                                                                                      |
|------------|------------------------------------------------------------------------------------------------------------------------------------------------------------|------------------------------------------------------------------------------------------------------------|--------------------------------------------------------------------------------------------------------------|
| S29        | S14 AND S19 AND S27                                                                                                                                        | Limiters -<br>Published Date:<br>19970101-<br>20171231; English<br>Language;<br>Exclude MEDLINE<br>records | View Results  (36)        |
| S28        | S14 AND S19 AND S27                                                                                                                                        |                                                                                                            | View Results  (89)        |
| S27        | S20 OR S21 OR S22 OR S23 OR S24 OR S25<br>OR S26                                                                                                           |                                                                                                            | View Results  (49,650)    |
| S26        | ((TX hyperplasia or TX carcinoma*) w2 (TX<br>intraductal or TX "DCIS" or TX ductal or TX "in<br>situ" OR TX noninfiltrating))                              |                                                                                                            | View Results  (2,225)     |
| S25        | ((AB hyperplasia or AB carcinoma*) w2 (AB<br>intraductal or AB "DCIS" or AB ductal or AB "in<br>situ" OR AB noninfiltrating))                              |                                                                                                            | View Results  (733)      |
| S24        | ((TI hyperplasia or TI carcinoma*) w2 (TI<br>intraductal or TI "DCIS" or TI ductal or TI "in<br>situ" or TI noninfiltrating))                              |                                                                                                            | View Results  (430)     |
| S23        | ((TX breast* or TX mammar*) w2 (TX<br>neoplasm* or TX cancer* or TX carcinoma* or<br>TX tumor or TX tumour or TX tumors or TX<br>tumours or TX malignan*)) |                                                                                                            | View Results  (48,903)  |
| S22        | ((AB breast* or AB mammar*) w2 (AB<br>neoplasm* or AB cancer* or AB carcinoma* or<br>AB tumor or AB tumour or AB tumors or AB<br>tumours or AB malignan*)) |                                                                                                            | View Results  (21,423)  |
| S21        | ((TI breast* or TI mammar*) w2 (TI neoplasm*<br>or TI cancer* or TI carcinoma* or TI tumor or TI<br>tumour or TI tumors or TI tumours or TI<br>malignan*)) |                                                                                                            | View Results  (26,102)  |
| S20        | MH "breast neoplasms+" or MH "carcinoma,<br>ductal, breast+"                                                                                               |                                                                                                            | View Results  (41,084)  |
| S19        | S15 OR S16 OR S17 OR S18                                                                                                                                   |                                                                                                            | View Results  (142,864) |

| Search ID# | Search Terms                                                                                                                                                                                                                                                                                                                                                                                                | Search Options | Actions                                                                                                     |
|------------|-------------------------------------------------------------------------------------------------------------------------------------------------------------------------------------------------------------------------------------------------------------------------------------------------------------------------------------------------------------------------------------------------------------|----------------|-------------------------------------------------------------------------------------------------------------|
| S18        | (TX ultrasonograph* or TX ultrasound* or TX "clinical breast exam" or TX "breast self-exam" or TX "CBE" or TX "BSE" or TX mammogra* or TX "magnetic resonance imaging" or TX "MRI" or TX xeromammogra* or TX scintimammogra* or TX tomosynthesis or TX imaging)                                                                                                                                             |                | View Results  (140,773)  |
| S17        | (AB ultrasonograph* or AB ultrasound* or AB "clinical breast exam" or AB "breast self-exam" or AB "CBE" or AB "BSE" or AB mammogra* or AB "magnetic resonance imaging" or AB "MRI" or AB xeromammogra* or AB scintimammogra* or AB tomosynthesis or AB imaging)                                                                                                                                             |                | View Results  (61,252)   |
| S16        | (TI ultrasonograph* or TI ultrasound* or TI "clinical breast exam" or TI "breast self-exam" or TI "CBE" or TI "BSE" or TI mammogra* or TI "magnetic resonance imaging" or TI "MRI" or TI xeromammogra* or TI scintimammogra* or TI tomosynthesis or TI imaging)                                                                                                                                             |                | View Results  (34,931)   |
| S15        | MH "early detection of cancer+" or MH "magnetic resonance imaging+" or MH "mammography+"                                                                                                                                                                                                                                                                                                                    |                | View Results  (49,034)   |
| S14        | S1 OR S2 OR S3 OR S4 OR S5 OR S6 OR S7 OR S8 OR S9 OR S10 OR S11 OR S12 OR S13                                                                                                                                                                                                                                                                                                                              |                | View Results  (45,864)  |
| S13        | (TX "female-to-male" or TX "male-to-female" or TX FTM or TX MTF or TX "sexual minorit*" or TX "cross gender*" or TX crossgender* or TX transvesti* or TX "cross dress*" or TX crossdress* or TX "cross sex*" or TX crosssex* or TX agender or TX bigender or TX "bi gender" or TX genderqueer or TX cisgender or TX "cis gender" or TX "two spirit*" or TX twospirit* or TX "2 spirit*" or TX 2spirit*)     |                | View Results  (10,512) |
| S12        | (AB "female-to-male" or AB "male-to-female" or AB "FTM" or AB "MTF" or AB "sexual minorit*" or AB "cross gender*" or AB crossgender* or AB transvesti* or AB "cross dress*" or AB crossdress* or AB "cross sex*" or AB crosssex* or AB agender or AB bigender or AB "bi gender" or AB genderqueer or AB cisgender or AB "cis gender" or AB "two spirit*" or AB twospirit* or AB "2 spirit*" or AB 2spirit*) |                | View Results  (9,060)  |
| S11        | (TI "female-to-male" or TI "male-to-female" or TI "FTM" or TI "MTF" or TI "sexual minorit*" or TI "cross gender*" or TI crossgender* or TI transvesti* or TI "cross dress*" or TI crossdress* or TI "cross sex*" or TI crosssex* or TI agender                                                                                                                                                              |                | View Results  (1,391)  |

| Search ID# | Search Terms                                                                                                                                                                                                                      | Search Options | Actions                                                                                                    |
|------------|-----------------------------------------------------------------------------------------------------------------------------------------------------------------------------------------------------------------------------------|----------------|------------------------------------------------------------------------------------------------------------|
|            | or TI bigender or TI "bi gender" or TI genderqueer or TI cisgender or TI "cis gender" or TI "two spirit*" or TI twospirit* or TI "2 spirit*" or TI 2spirit*)                                                                      |                |                                                                                                            |
| S10        | ((TX gender* or TX sex*) w1 (TX trans* or TX variant or TX identity or TX "non binary" or TX nonbinary or TX queer or TX fluid or TX nonconform* or TX "non conform*" or TX reassign* or TX "re assign*" or TX dysphori*))        |                | View Results  (17,343)  |
| S9         | ((AB gender* or AB sex*) w1 (AB trans* or AB variant or AB identity or AB "non binary" or AB nonbinary or AB queer or AB fluid or AB nonconform* or AB "non conform*" or AB reassign* or AB "re assign*" or AB dysphori*))        |                | View Results  (6,567)   |
| S8         | ((TI gender* or TI sex*) w1 (TI trans* or TI variant or TI identity or TI "non binary" or TI nonbinary or TI queer or TI fluid or TI nonconform* or TI "non conform*" or TI reassign* or TI "re assign*" or TI dysphori*))        |                | View Results  (2,854)   |
| S7         | ((TX trans*) w2 (TX sex* or TX gender* or TX woman or TX women or TX female* or TX feminine or TX male or TX males or TX man or TX men or TX masc* or TX identified or TX person or TX persons or TX people or TX peoples))       |                | View Results  (4,993)   |
| S6         | ((AB trans*) w2 (AB sex* or AB gender* or AB woman or AB women or AB female* or AB feminine or AB male or AB males or AB man or AB men or AB masc* or AB identified or AB person or AB persons or AB people or AB peoples))       |                | View Results  (3,124) |
| S5         | ((TI trans*) w2 (TI sex* or TI gender* or TI woman or TI women or TI female* or TI feminine or TI male or TI males or TI man or TI men or TI masc* or TI identified or TI person or TI persons or TI people or TI peoples))       |                | View Results  (941)   |
| S4         | ((TX transgend* or TX transsex* or TX transman or TX transmen or TX transwom* or TX transfem* or TX transmasc* or TX transmale* or TX transidentified or TX transperson or TX transpersons or TX transpeople or TX transpeoples)) |                | View Results  (3,143) |
| S3         | ((AB transgend* or AB transsex* or AB transman or AB transmen or AB transwom* or AB transfem* or AB transmasc* or AB transmale* or AB transidentified or AB                                                                       |                | View Results  (1,842) |

| Search ID# | Search Terms                                                                                                                                                                                                                     | Search Options | Actions                                                                                                   |
|------------|----------------------------------------------------------------------------------------------------------------------------------------------------------------------------------------------------------------------------------|----------------|-----------------------------------------------------------------------------------------------------------|
|            | transperson or AB transpersons or AB transpeople or AB transpeoples)                                                                                                                                                             |                |                                                                                                           |
| S2         | ((TI transgend* or TI transsex* or TI transman or TI transmen or TI transwom* or TI transfem* or TI transmasc* or TI transmale* or TI transidentified or TI transperson or TI transpersons or TI transpeople or TI transpeoples) |                | View Results  (1,445)  |
| S1         | (MH "transgender persons+") or (MH "health services needs and demand+") or (MH "transsexualism") or (MH "transvestism")                                                                                                          |                | View Results  (15,626) |

**Database:** Cochrane Database of Systematic Reviews

**Date Run:** May 9, 2017

**Platform/Interface:** Ovid Evidence-Based Medicine Reviews, Cochrane Database of Systematic Reviews 2005 to May 09, 2017

**Result Number:** 3

**Search Strategy:**

| #  | Searches                                                                                                                                                                                                                                                                                                                                        | Results |
|----|-------------------------------------------------------------------------------------------------------------------------------------------------------------------------------------------------------------------------------------------------------------------------------------------------------------------------------------------------|---------|
| 1  | (transgend* or transsex* or transman or transmen or transwom* or transfem* or transmasc* or transmale* or transidentified or transperson or transpersons or transpeople or transpeoples).ti,ab,kw.                                                                                                                                              | 7       |
| 2  | (trans* adj2 (sex* or gender* or woman or women or female* or feminine or male or males or man or men or masc* or identified or person or persons or people or peoples)).ti,ab,kw.                                                                                                                                                              | 99      |
| 3  | ((gender* or sex*) adj1 (trans* or variant or identity or "non binary" or nonbinary or queer or fluid or nonconform* or non conform* or reassign* or re assign* or dysphori*)).ti,ab,kw.                                                                                                                                                        | 43      |
| 4  | ("female-to-male" or "male-to-female" or FTM or MTF or "sexual minorit*" or "cross gender*" or crossgender* or transvesti* or "cross dress*" or crossdress* or "cross sex*" or crosssex* or agender or bigender or "bi gender" or genderqueer or cisgender or "cis gender" or "two spirit*" or twospirit* or "2 spirit*" or 2spirit*).ti,ab,kw. | 25      |
| 5  | or/1-4                                                                                                                                                                                                                                                                                                                                          | 123     |
| 6  | (ultrasonograph* or ultrasound* or "clinical breast exam" or "breast self-exam" or "CBE" or "BSE" or mammogra* or "magnetic resonance imaging" or "MRI" or xeromammogra* or scintimammogra* or tomosynthesis or imaging).ti,ab,kw.                                                                                                              | 287     |
| 7  | ((breast* or mammar*) adj2 (neoplasm* or cancer* or carcinoma* or tumor or tumour or tumors or tumours or malignan*)).ti,ab,kw.                                                                                                                                                                                                                 | 123     |
| 8  | ((hyperplasia or carcinoma*) adj2 (intraductal or DCIS or ductal or "in situ" or noninfiltrating)).ti,ab,kw.                                                                                                                                                                                                                                    | 13      |
| 9  | or/6-8                                                                                                                                                                                                                                                                                                                                          | 409     |
| 10 | 5 and 9                                                                                                                                                                                                                                                                                                                                         | 3       |



# Electronic Database Searches for Review Three (Breast Screening for Trans Populations: A Systematic Review of Guidelines and Position Statements)

**Database:** MEDLINE

**Date Run:** February 13, 2017

**Platforms/Interface:** Ovid MEDLINE(R) 1946 to February Week 7 2017

**Result Number:** 76

**Search Strategy:**

| #  | Searches                                                                                                                                                                                                                                                                                                     | Results |
|----|--------------------------------------------------------------------------------------------------------------------------------------------------------------------------------------------------------------------------------------------------------------------------------------------------------------|---------|
| 1  | exp "transgender persons"/ or exp "health services for transgender persons"/ or exp transsexualism/ or exp transvestism/                                                                                                                                                                                     | 4580    |
| 2  | (transgender* or transsex* or transman or transwoman or transmen or transwomen or transfem*).ti,ab,kw.                                                                                                                                                                                                       | 7144    |
| 3  | (Trans adj2 (sexual or sexuals or gender* or gendered or woman or women or man or men or identified)).ti,ab,kw.                                                                                                                                                                                              | 325     |
| 4  | (gender* adj1 (trans or variant or identity or "two spirit" or "twospirit" or "non-binary" or queer or "genderqueer" or fluid or "nonconforming" or "non conforming" or reassign* or re assign*).ti,ab,kw.                                                                                                   | 1957    |
| 5  | ("Female-to-Male" or "male-to-female" or "FTM" or "MTF" or "sexual minority" or "sexual minorities" or "cross gender" or "cross gendered" or "cross dressing" or "cross dress" or "cross dresser" or transvesti* or agender or bigender or cisgender or "a gender" or "bi gender" or "cis gender").ti,ab,kw. | 103125  |
| 6  | or/1-5                                                                                                                                                                                                                                                                                                       | 111020  |
| 7  | exp breast neoplasm/                                                                                                                                                                                                                                                                                         | 250077  |
| 8  | ((breast* or mammar*) adj2 (neoplasm* or cancer or carcinoma or tumor or tumour or tumors or tumours or malignan*).ti,ab,kw.                                                                                                                                                                                 | 229948  |
| 9  | or/7-8                                                                                                                                                                                                                                                                                                       | 299677  |
| 10 | exp "mass screening"/ or exp "early detection of cancer"/ or "magnetic resonance imaging"/ or exp "ultrasonography, mammary"/ or exp "mammography"/                                                                                                                                                          | 471932  |
| 11 | (ultrasonograph* or ultrasound* or "clinical breast exam" or "breast self-exam" or "CBE" or "BSE" or mammogra* or "magnetic resonance imaging" or "MRI" or xeromammogra* or Scintimammogra* or tomosynthesis or imaging).ti,ab,kw.                                                                           | 786658  |
| 12 | or/10-11                                                                                                                                                                                                                                                                                                     | 1017030 |
| 13 | 6 and 9 and 12                                                                                                                                                                                                                                                                                               | 82      |
| 14 | limit 13 to (english language and yr="1997 -Current")                                                                                                                                                                                                                                                        | 76      |

Database: PubMed

Date Run: February 13, 2017

Result Number: 91

Search Strategy:

| Search              | Query                                                                                                                                                                                                                                                                                                                                                                                                                                                              | Items found             |
|---------------------|--------------------------------------------------------------------------------------------------------------------------------------------------------------------------------------------------------------------------------------------------------------------------------------------------------------------------------------------------------------------------------------------------------------------------------------------------------------------|-------------------------|
| <a href="#">#11</a> | Search #6 AND #7 AND #8 Filters: Publication date from 1997/01/01 to 2017/12/31; English                                                                                                                                                                                                                                                                                                                                                                           | <a href="#">91</a>      |
| <a href="#">#10</a> | Search #6 AND #7 AND #8 Filters: Publication date from 1997/01/01 to 2017/12/31                                                                                                                                                                                                                                                                                                                                                                                    | <a href="#">96</a>      |
| <a href="#">#9</a>  | Search #6 AND #7 AND #8                                                                                                                                                                                                                                                                                                                                                                                                                                            | <a href="#">102</a>     |
| <a href="#">#8</a>  | Search "mass screening"[mh] OR "early detection of cancer"[mh] OR mammography[mh] OR "magnetic resonance imaging"[mh:noexp] OR "ultrasonography, mammary"[mh] OR "clinical breast exam"[tiab] OR "breast self-exam"[tiab] OR "CBE"[tiab] OR "BSE"[tiab] OR xeromammogra*[tiab] OR "MRI"[tiab] OR magnetic resonance imaging[tiab] OR mammogr*[tiab] OR ultrasound*[tiab] OR ultrasonograph*[tiab] OR Scintimammogra*[tiab] OR imaging[tiab] OR tomosynthesis[tiab] | <a href="#">1148137</a> |
| <a href="#">#7</a>  | Search breast neoplasm[mh] OR ((breast*[tiab] OR mammar*[tiab]) AND (neoplasm*[tiab] OR cancer[tiab] OR carcinoma[tiab] OR tumor[tiab] OR tumour[tiab] OR tumors[tiab] OR tumours[tiab] OR malignan*[tiab]))                                                                                                                                                                                                                                                       | <a href="#">352716</a>  |
| <a href="#">#6</a>  | Search #1 OR #2 OR #3 OR #4 OR #5                                                                                                                                                                                                                                                                                                                                                                                                                                  | <a href="#">46306</a>   |
| <a href="#">#5</a>  | Search "Female-to-Male"[tiab] OR "male-to-female"[tiab] OR "FTM"[tiab] OR "MTF"[tiab] OR "sexual minority"[tiab] OR "sexual minorities"[tiab] OR "cross gender"[tiab] OR "cross gendered"[tiab] OR transvesti*[tiab] OR "cross dress"[tiab] OR "cross dresser"[tiab] OR "cross dressing"[tiab] OR agender[tiab] OR bigender[tiab] OR cisgender[tiab] OR "a gender"[tiab] OR "bi gender"[tiab] OR "cis gender"[tiab]                                                | <a href="#">16419</a>   |
| <a href="#">#4</a>  | Search ((gender*[tiab]) AND (trans[tiab] OR variant[tiab] OR identity[tiab] OR variant[tiab] OR "two spirit"[tiab] OR "twospirit"[tiab] OR "non-binary"[tiab] OR queer[tiab] OR "genderqueer"[tiab] OR fluid[tiab] OR "nonconforming"[tiab] OR "non conforming"[tiab] OR reassign*[tiab] OR re assign*[tiab]))                                                                                                                                                     | <a href="#">9097</a>    |
| <a href="#">#3</a>  | Search ((Trans[tiab]) AND (sexual[tiab] OR sexuals[tiab] OR gender[tiab] OR gendered[tiab] OR woman[tiab] OR women[tiab] OR man[tiab] OR men[tiab] OR identified[tiab]))                                                                                                                                                                                                                                                                                           | <a href="#">14943</a>   |
| <a href="#">#2</a>  | Search transgender*[tiab] OR transsex*[tiab] OR transman[tiab] OR transwoman[tiab] OR transmen[tiab] OR transwomen[tiab] OR transfem*[tiab]                                                                                                                                                                                                                                                                                                                        | <a href="#">8556</a>    |
| <a href="#">#1</a>  | Search "transgender persons"[mh] OR "health services for transgender persons"[mh] OR transsexualism[mh] OR "Transvestism"[Mesh]                                                                                                                                                                                                                                                                                                                                    | <a href="#">4505</a>    |
